# Supplementary material for: Biobased copoly(acetal-triazole)s with tunable degradable properties
Source: Royal Society of Chemistry journal article supplement (doi:10.1039/d4me00005f), 2024-01-01

## Supporting Information

# Biobased Copoly(acetal-triazole)s with Tunable Degradable Properties

*Joseph C. Daniels, ‡ Guery Saenz, ‡ and Colleen N. Scott\**

Department of Chemistry, Mississippi State University, Starkville, Mississippi 39762, USA

### **Corresponding Author**

Colleen N. Scott

[cscott@chemistry.msstate.edu](mailto:cscott@chemistry.msstate.edu)

Department of Chemistry, Mississippi State University, Starkville, Mississippi 39762, USA

**Table S1.** Polymer optimization. Molecular weight of furfural-based\_copoly(acetal-triazole)s **P2-1** to **P2-5** after 96 h of polymerization.

| Polymers | Monomer Ratio          |                                      | Molar Mass, kg/mol <sup>a</sup> |             |               |
|----------|------------------------|--------------------------------------|---------------------------------|-------------|---------------|
|          | Mol % Feed<br>TPhA:HQA | Mol % <sup>1</sup> H NMR<br>TPhA:HQA | $\bar{M}_n$                     | $\bar{M}_w$ | $\mathcal{D}$ |
| P2-1     | 1.00:0.00              | 1.00:0.00                            | 5.6                             | 15.6        | 2.8           |
| P2-2     | 0.70:0.30              | 0.68:0.32                            | 6.7                             | 19.7        | 2.9           |
| P2-3     | 0.50:0.50              | 0.54:0.46                            | 7.4                             | 19.2        | 2.6           |
| P2-4     | 0.30:0.70              | 0.24:0.76                            | 11.1                            | 22.5        | 2.0           |
| P2-5     | 0.00:1.00              | 0.00:1.00                            | 12.7                            | 26.5        | 2.1           |

SEC was used to obtain this data. GPC Condition: CHCl<sub>3</sub> + 0.2 M TEA at 40 °C. Molecular weights in kDa.

**Figure S1** TGA data comparing monomers to P2-4.

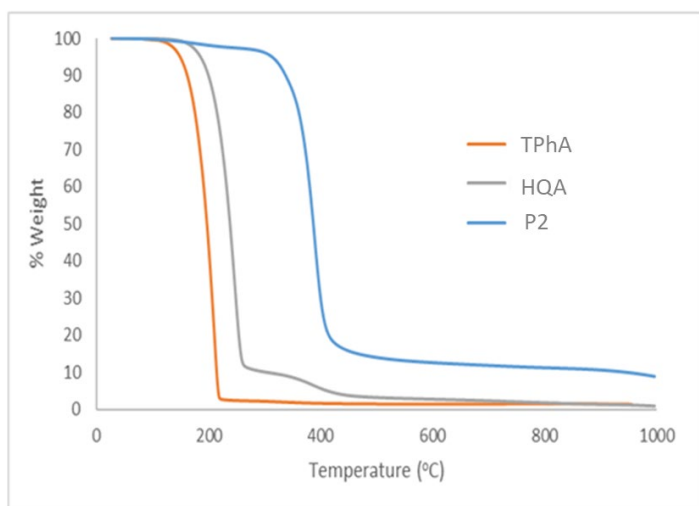

Figure S2 TGA data for P1 – P3

P1

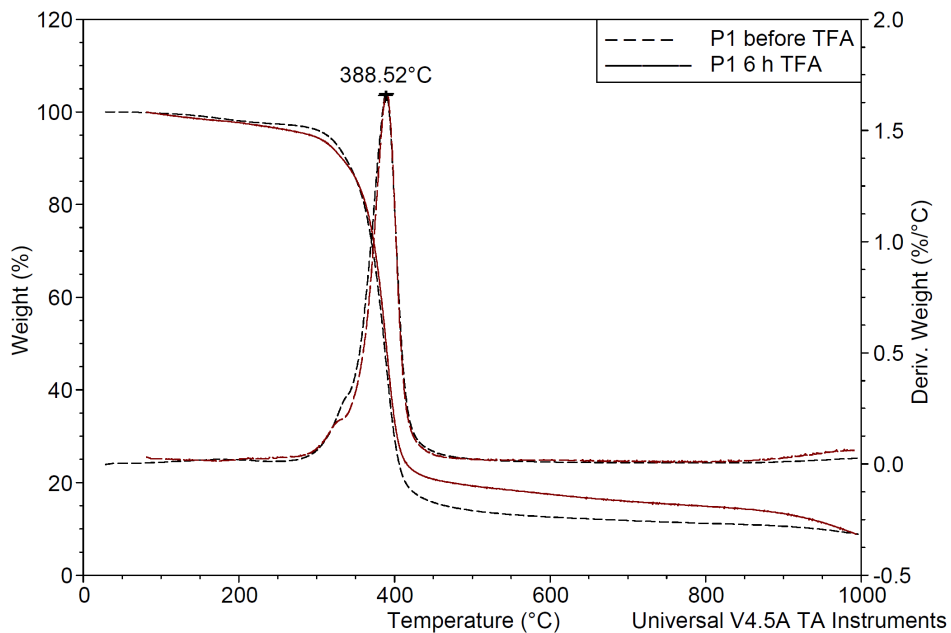

P2

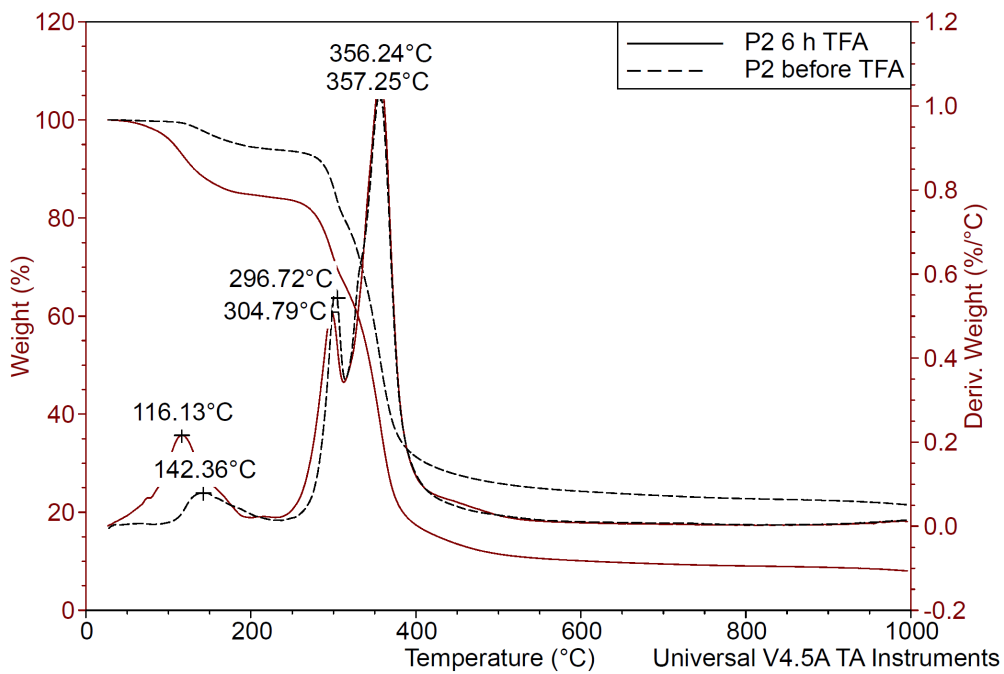

P3

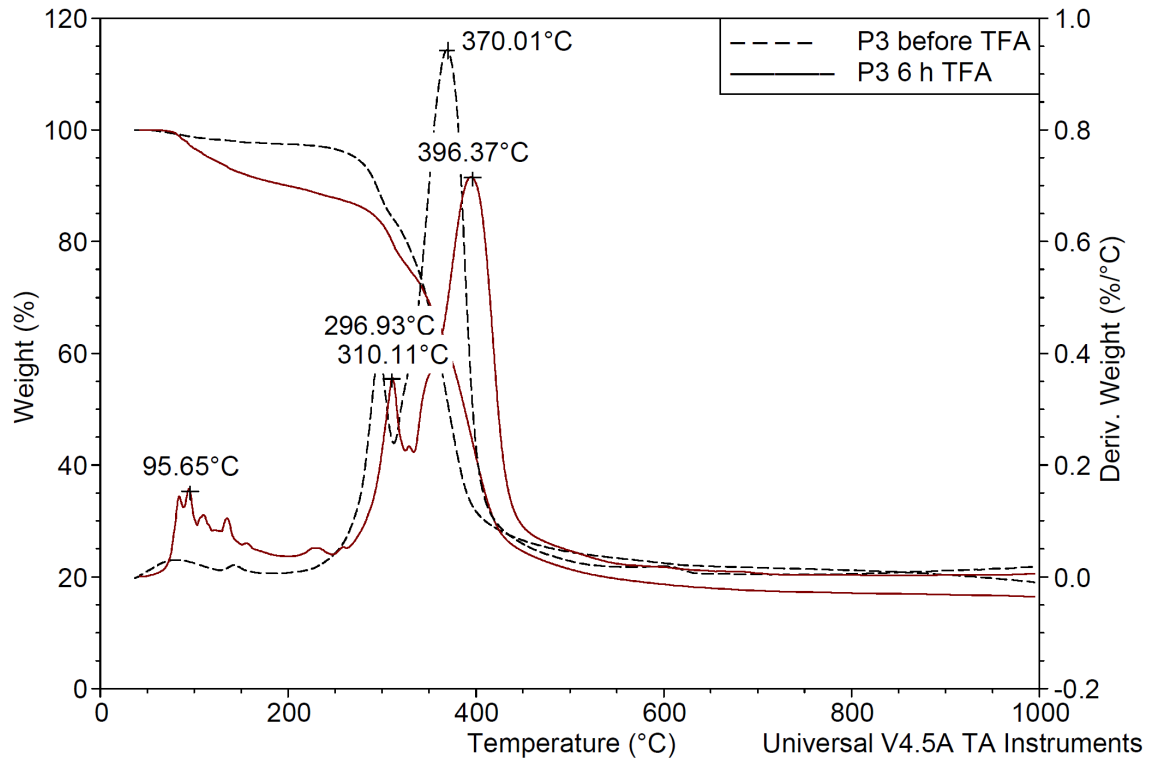

Figure S3 DSC for P1 – P3

P1

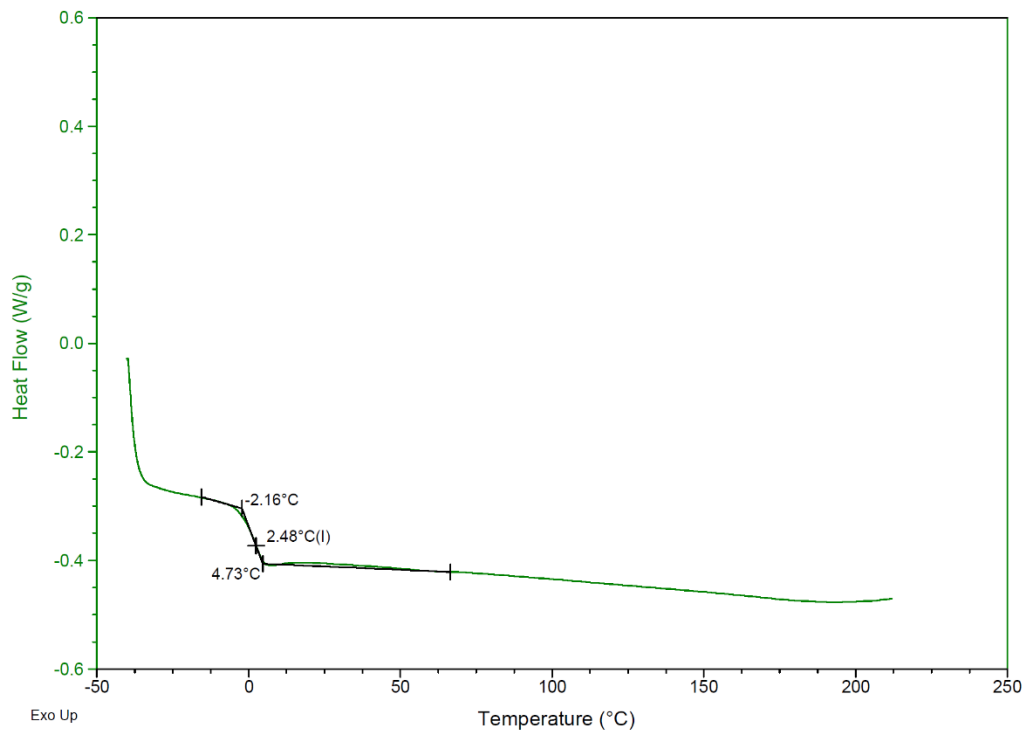

P2

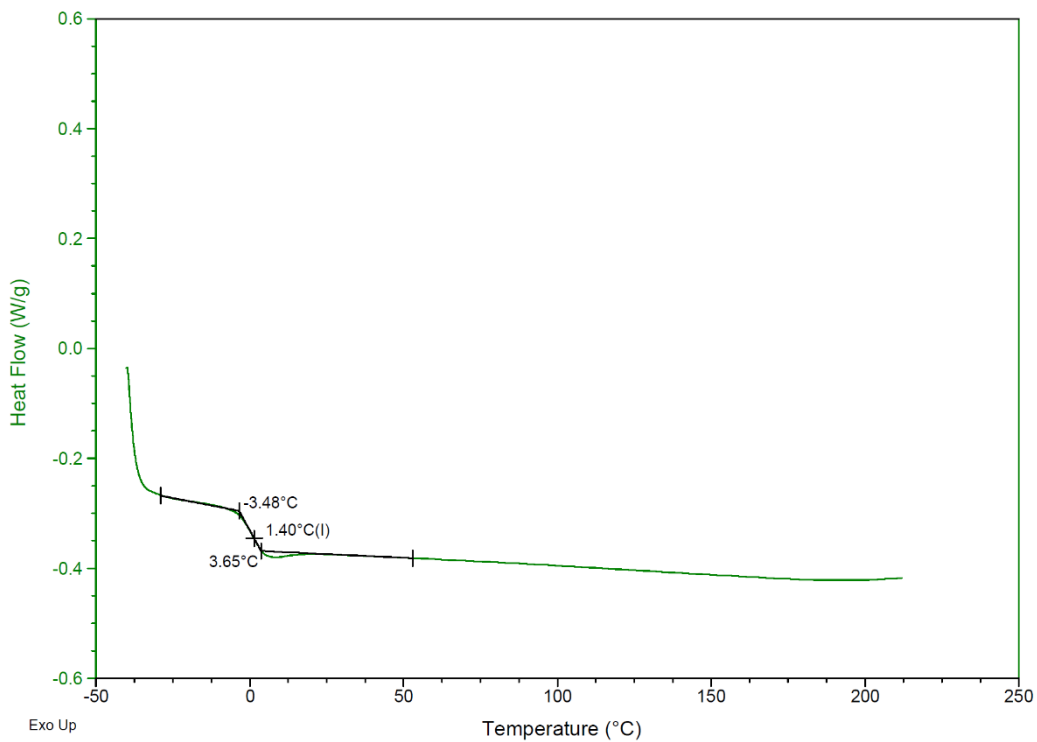

P3

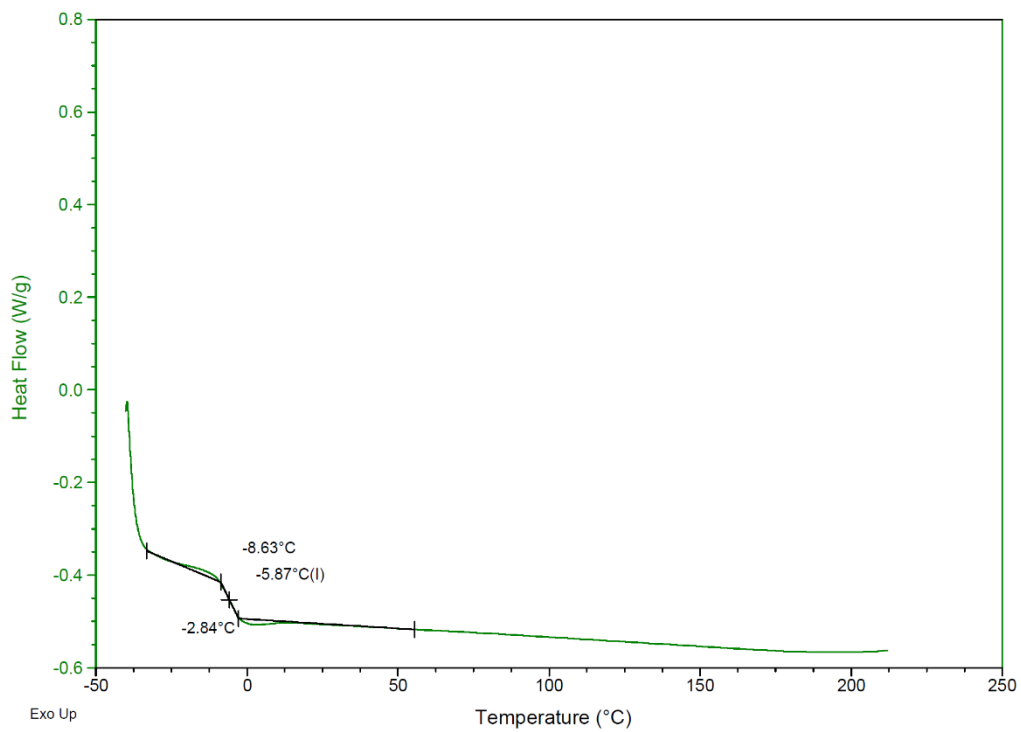

**Figure S4.**  $^1\text{H}$  NMR spectra of monomers (500 MHz,  $\text{CDCl}_3$ , 298 K).

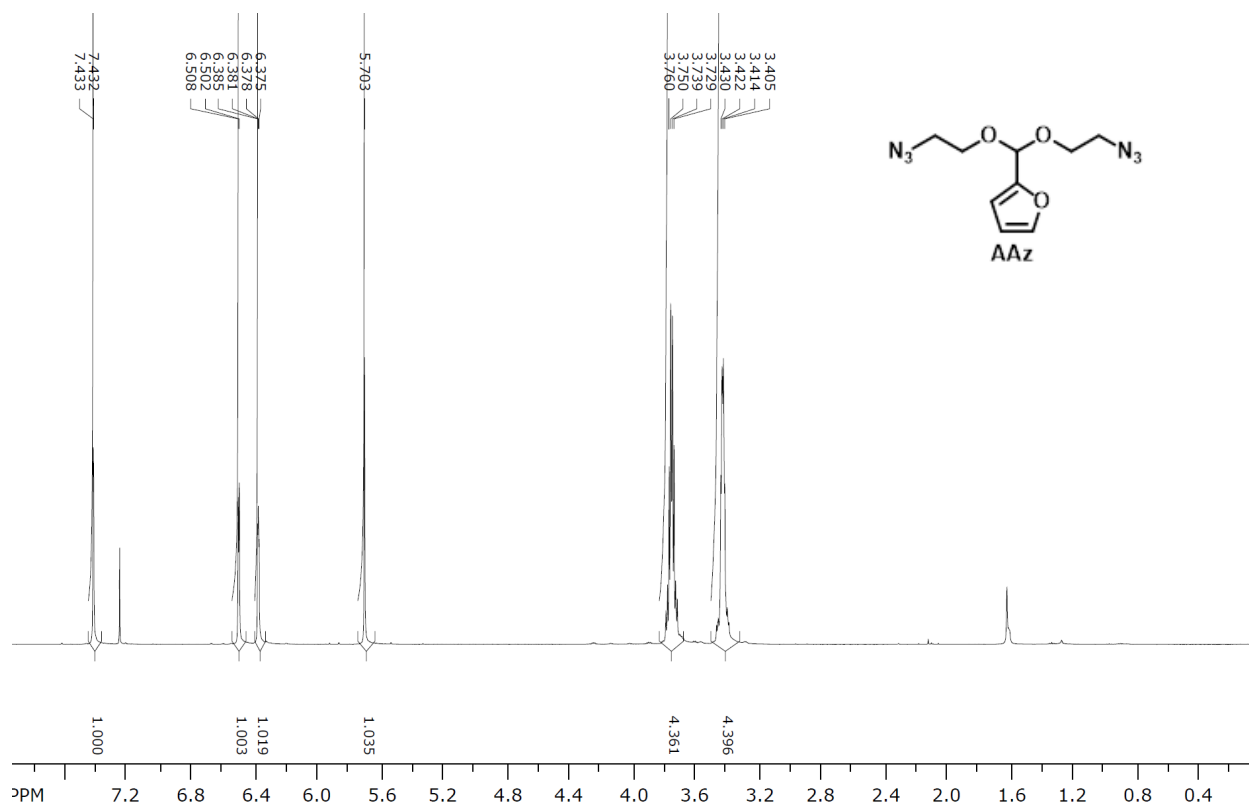

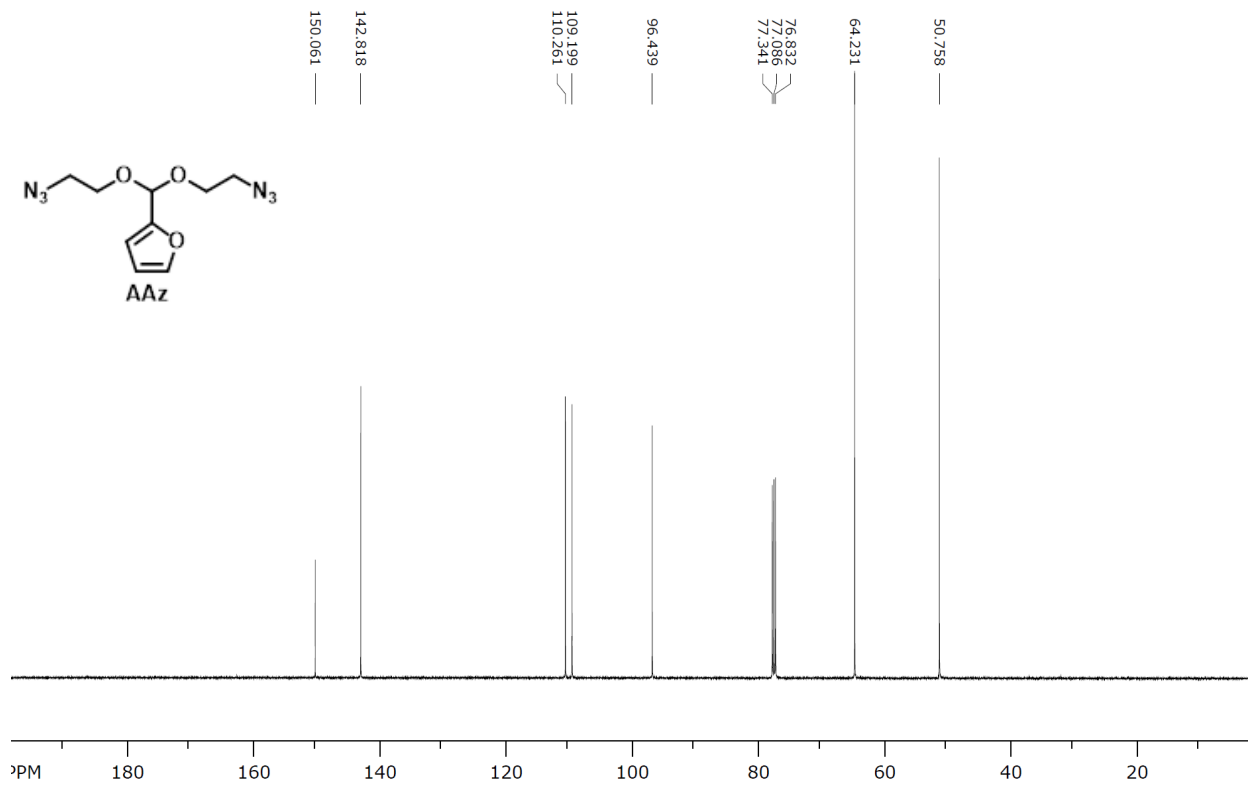



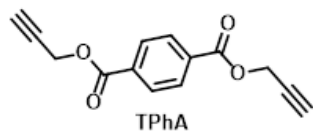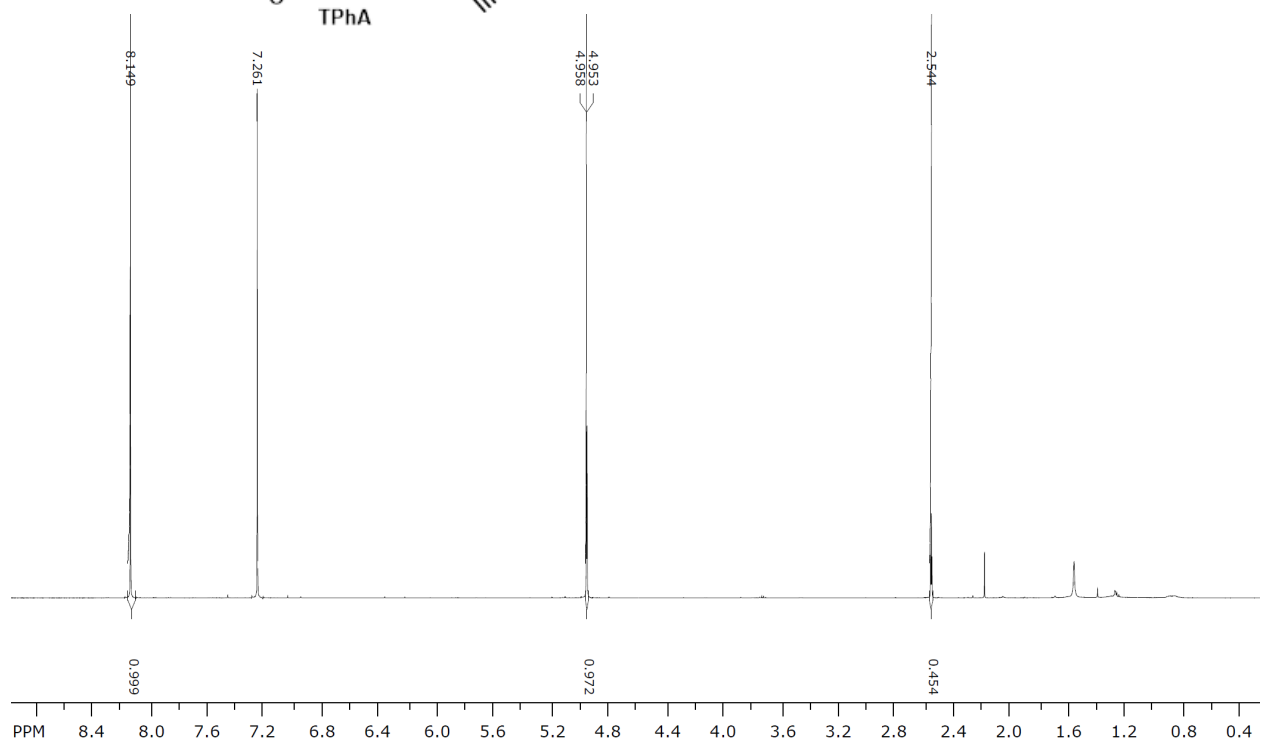

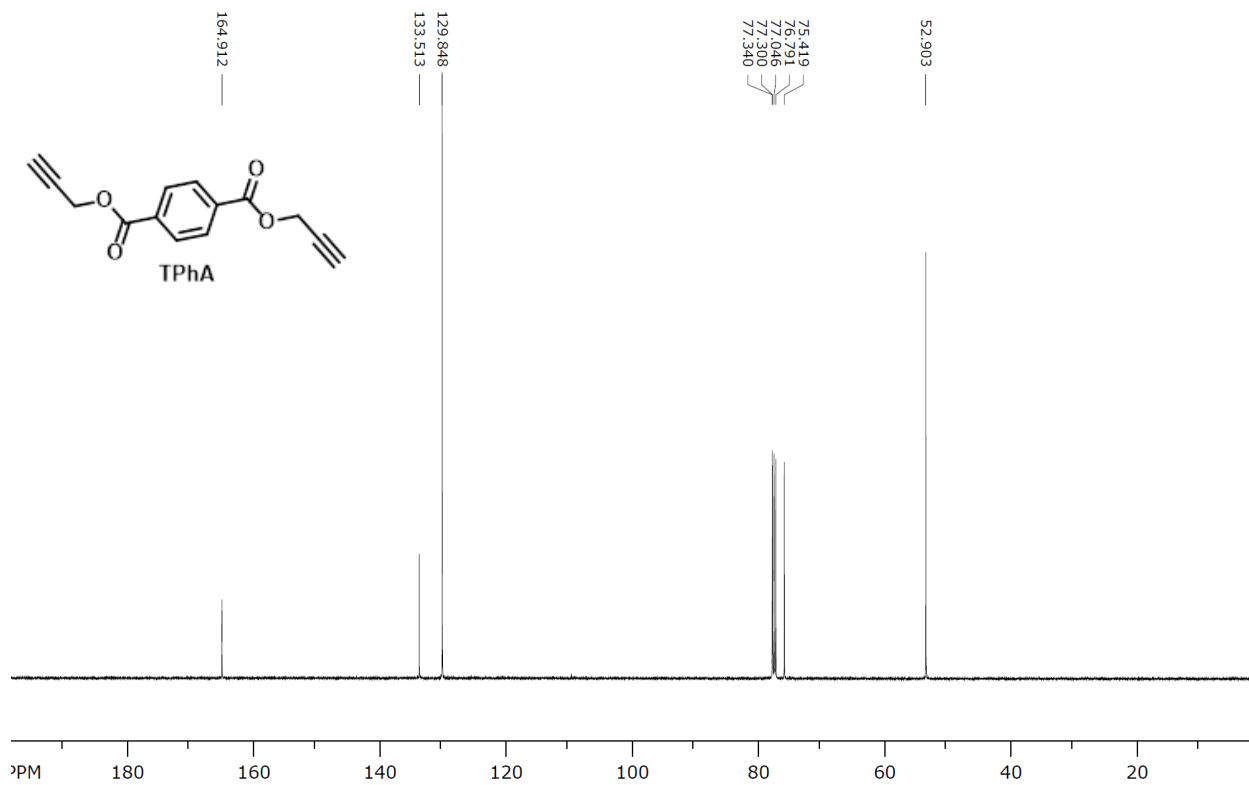

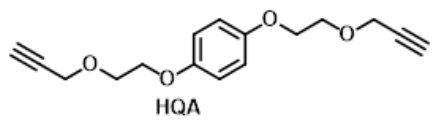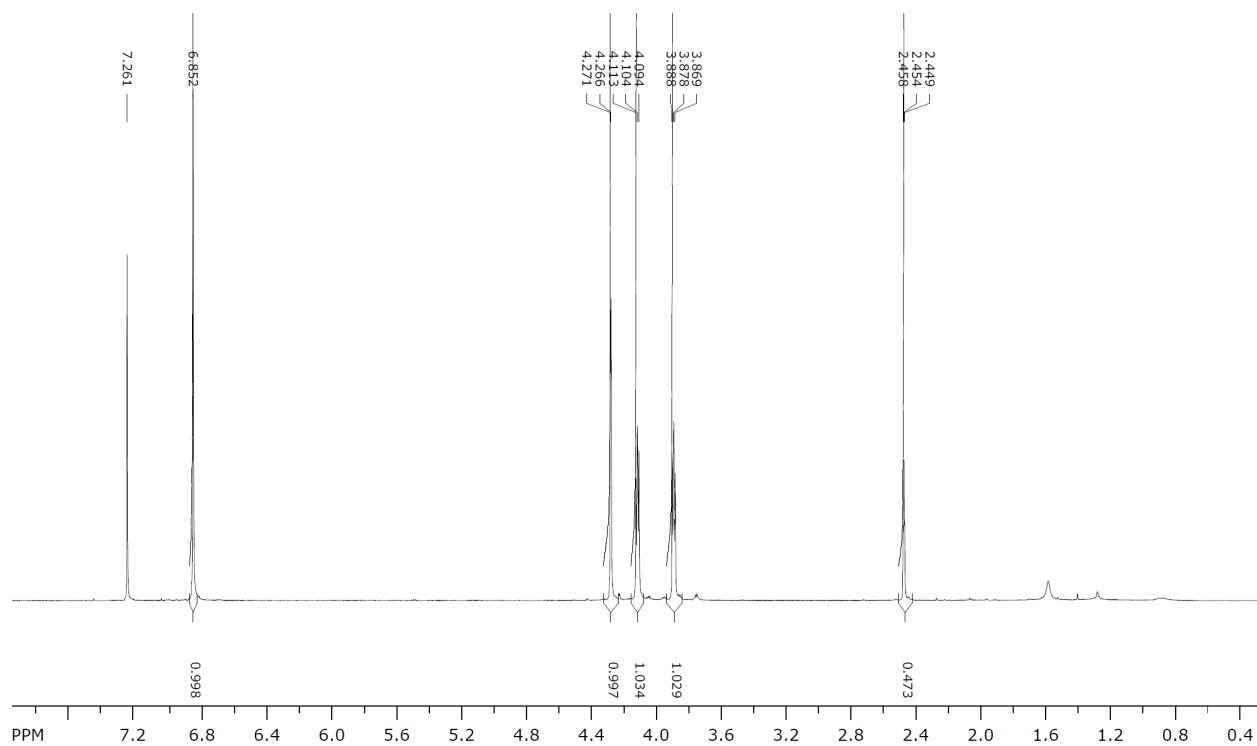

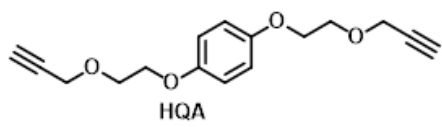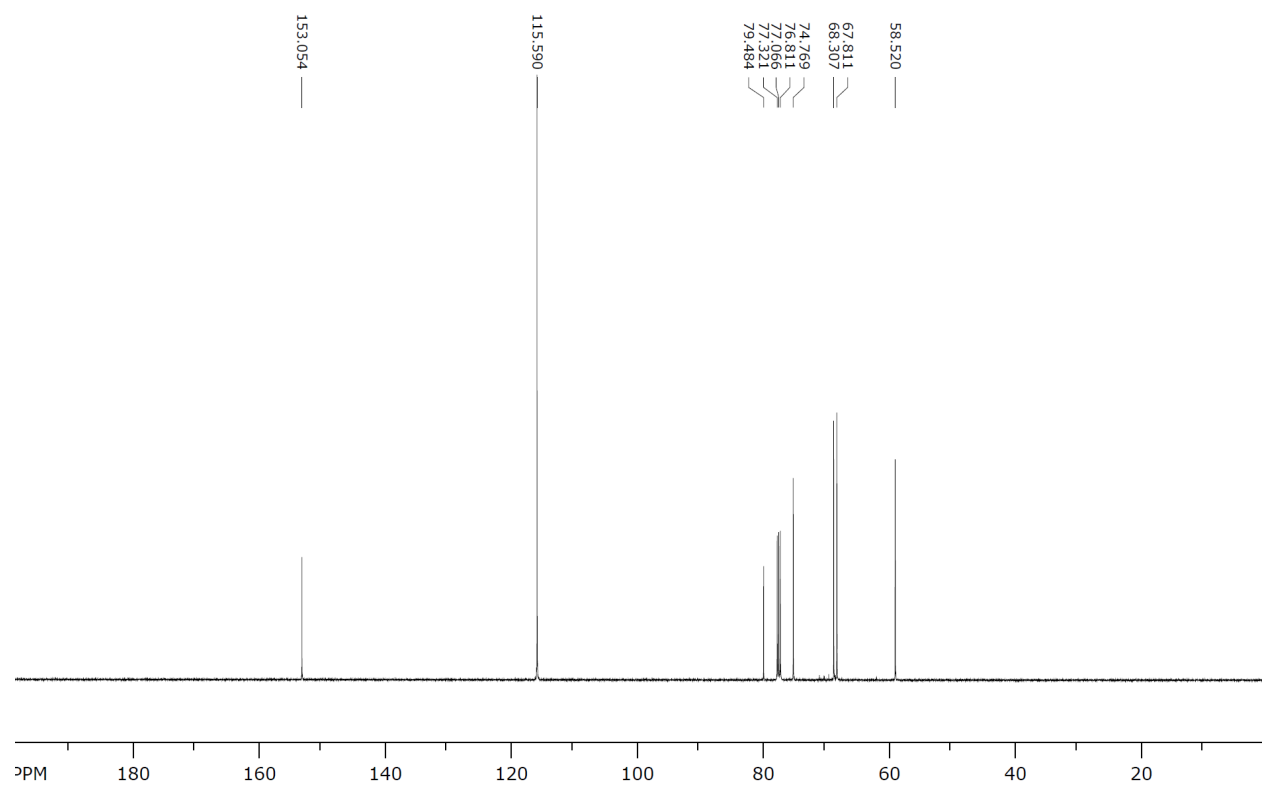

Figure S5  $^1\text{H}$  NMR spectra of **P1**, **P2**, and **P3**( (500 MHz,  $\text{CDCl}_3$ , 298 K).

**P1**

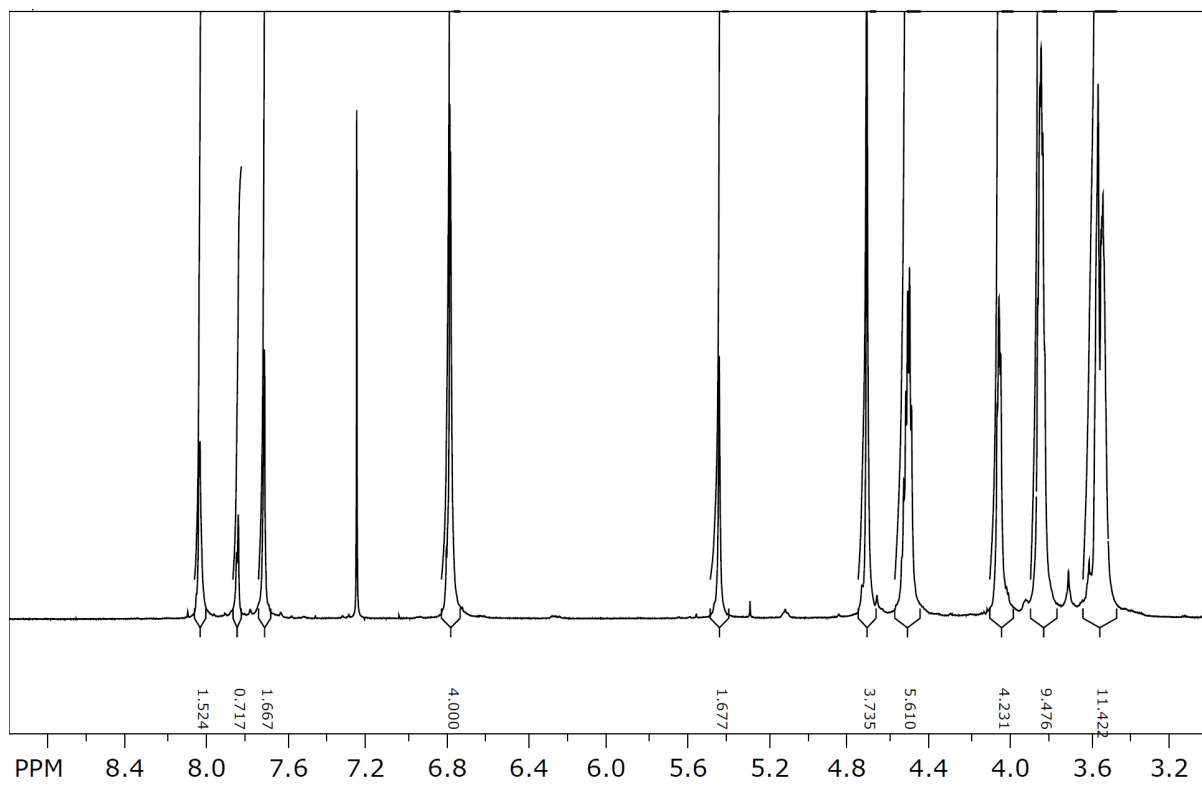

P2

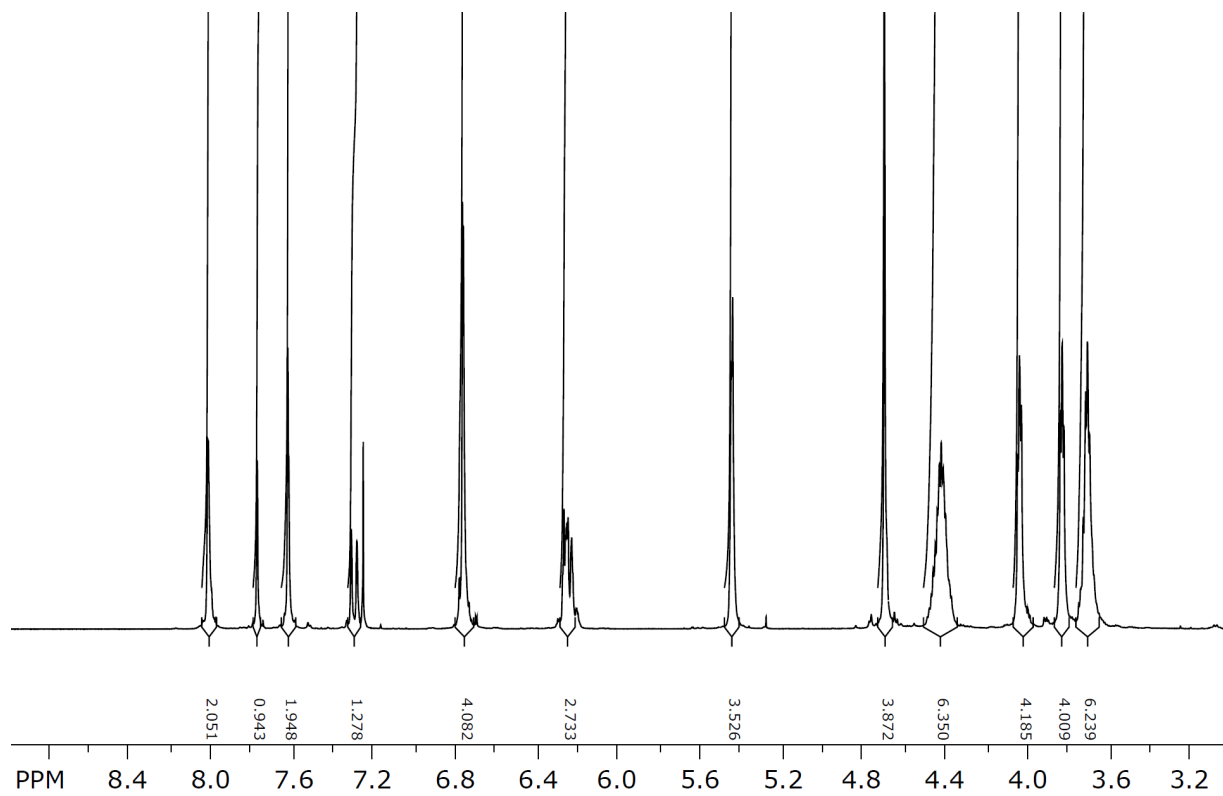

P3

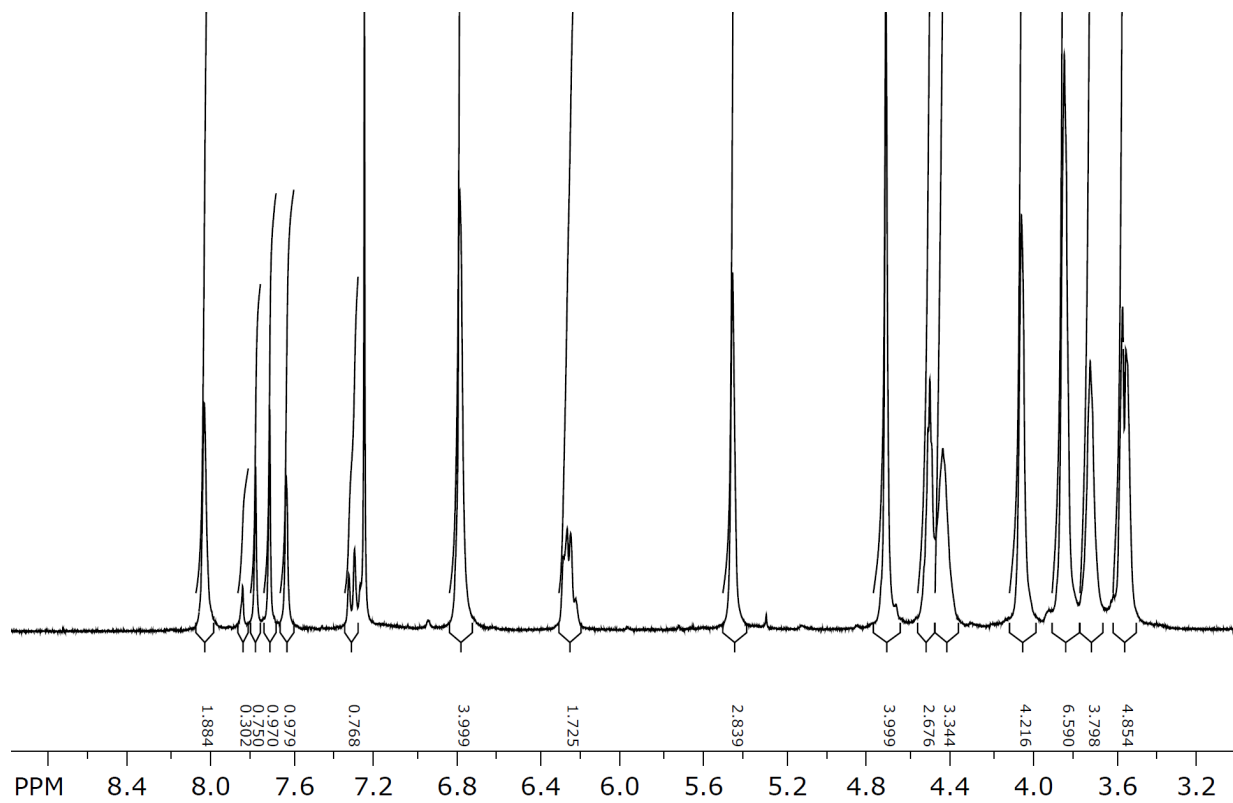

Supplement: d4me00005f1.pdf [file d4me00005f1.pdf]
